# Supplementary material for: Why Students Struggle in Undergraduate Biology: Sources and Solutions
Source: Atypon-hosted journal article supplement (doi:10.1187/cbe.21-09-0289), 2022-08-22
Supplement: combinedsupmats.pdf [file combinedsupmats.pdf]

# Supplemental Material

*CBE—Life Sciences Education*

Tracy *et al.*

## SUPPLEMENTAL MATERIALS

### Why students struggle in undergraduate biology: sources and solutions

Claire B. Tracy<sup>1\*</sup>, Emily P. Driessen<sup>1\*</sup>, Abby E. Beatty<sup>1</sup>, Todd Lamb<sup>1</sup>, Jenna E. Pruett<sup>1,2</sup>, Jake D. Botello<sup>1</sup>, Cara Brittain<sup>1</sup>, Ísada Claudio Ford<sup>1,3</sup>, Chloe C. Josefson<sup>4</sup>, Randy L. Klabacka<sup>1</sup>, Tyler Smith<sup>5</sup>, Ariel Steele<sup>6</sup>, Min Zhong<sup>1</sup>, Scott Bowling<sup>1</sup>, Lucinda Dixon<sup>7</sup>, and Cissy J. Ballen<sup>1</sup>

<sup>1</sup>Department of Biological Sciences, Auburn University, Auburn, AL 36849, USA

<sup>2</sup>Department of Ecology and Evolutionary Biology, University of Colorado Boulder, Boulder, CO 80309, USA

<sup>3</sup>Department of Natural Science, University of Puerto Rico, Rio Piedras, Puerto Rico

<sup>4</sup>Department of Animal, Veterinary, and Food Sciences, University of Idaho, Moscow, ID 83844, USA

<sup>5</sup>Department of Geosciences, Auburn University, Auburn, AL 36849, USA

<sup>6</sup>Department of Educational Foundations, Leadership, and Technology, Auburn University, Auburn, AL 36849, USA

<sup>7</sup>Lincoln Memorial University, Harrogate, TN 37752, USA

\*equal contributions

#### **Supplemental materials include:**

Table S1. *Survey Items.*

Figure S1. *Breakdown of student struggle across two semesters.*

Table S2. *Demographics.*

Table S3. *Sample size breakdown of students reporting encountering and overcoming struggle, broken down by semester.*

Table S4. *Model selection determining factors influencing how students encounter struggle.*

Table S5. *Model selection determining factors influencing how students overcome struggle.*

Table S6. *Linear model results of Encounter Struggle ~ PCI \* Course + (1 | Year\_Rank).*

Table S7. *Linear model results of Overcome Struggle ~ PCI + Instructor + (1 | Student).*

Figure S2. *Effects of Instructor and Incoming Preparation on Struggle.*

Table S8. *Model selection determining best fit model examining if encountering struggle influences course performance.*

Table S9. *Linear model of Final Score by Encounter Struggle (Y/N) and Incoming Preparation.*

Table S10. *Model selection determining best fit model examining if overcoming struggle influences course performance.*

Table S11. *Linear model of Final Score by Overcoming Struggle (Y/N) and Incoming Preparation.*

Table S1. *Survey Items.*

|                                                                                                                                                                                                                                                                                                                                                                                                                                                                     |
|---------------------------------------------------------------------------------------------------------------------------------------------------------------------------------------------------------------------------------------------------------------------------------------------------------------------------------------------------------------------------------------------------------------------------------------------------------------------|
| Survey Question                                                                                                                                                                                                                                                                                                                                                                                                                                                     |
| Did you encounter struggle in introductory biology this semester?<br>o Yes<br>o No                                                                                                                                                                                                                                                                                                                                                                                  |
| You report that you did encounter struggle. Were you able to overcome struggle that you encountered?<br>o Yes<br>o No                                                                                                                                                                                                                                                                                                                                               |
| <b>Display This Question:</b><br><b>If “Did you encounter struggle in introductory biology this semester?” = No</b><br>Your response suggests that you did not encounter struggle in introductory biology this semester. Please explain why this is or is not an accurate description of your experience                                                                                                                                                            |
| <b>Display This Question:</b><br><b>If Did you encounter struggle in introductory biology this semester? = Yes</b><br><b>And You report that you did encounter struggle. Were you able to overcome struggle that you encountered? = Yes</b><br>Your response suggests that you encountered struggle and successfully overcame this struggle in introductory biology this semester. Please explain why this is or is not an accurate description of your experience. |
| <b>Display This Question:</b><br><b>If “Did you encounter struggle in introductory biology this semester?” = Yes</b><br><b>And You report that you did encounter struggle. Were you able to overcome struggle that you encountered? = No</b><br>Your response suggests that you encountered struggle and could not overcome this struggle in introductory biology this semester. Please explain why this is or is not an accurate description of your experience.   |
| What year are you?<br>o First year (Freshman)<br>o Second year (Sophomore)<br>o Third year (Junior)<br>o Fourth year (Senior)                                                                                                                                                                                                                                                                                                                                       |
| What term best describes your gender identity?<br><input type="checkbox"/> Man<br><input type="checkbox"/> Woman<br><input type="checkbox"/> Intersex<br><input type="checkbox"/> Transgender<br><input type="checkbox"/> Gender Queer<br><input type="checkbox"/> Nonbinary<br><input type="checkbox"/> my gender is:                                                                                                                                              |
| What is your race/ethnicity? (Select multiple as they apply)<br><input type="checkbox"/> American Indian/Alaska Native<br><input type="checkbox"/> Asian/Asian American<br><input type="checkbox"/> Black/African American<br><input type="checkbox"/> Latino/Hispanic/Hispanic American<br><input type="checkbox"/> Native Hawaiian or Other Pacific Islander                                                                                                      |

White/European American

My race/ethnicity is...

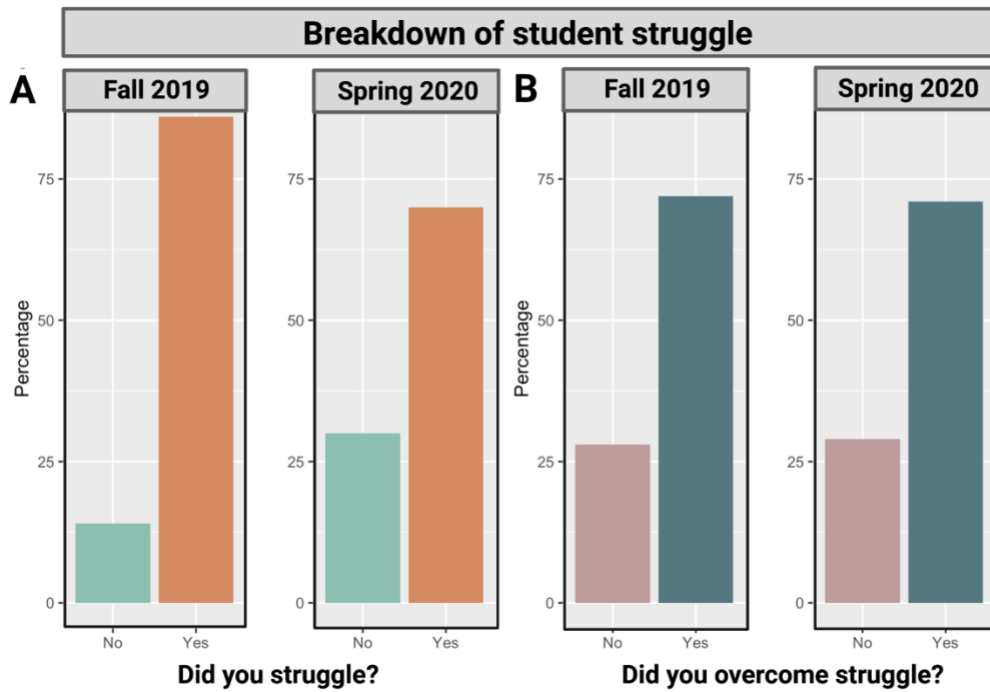

Figure S1. *Breakdown of student struggle across two semesters.* The percentage of students across two semesters who A) reported they did not struggle in biology (No) or reported they did struggle (Yes); B) Among students who reported experiencing struggle, we asked students whether they overcame that struggle. Students either reported they did not overcome their struggle (No) or reported they did overcome their struggle (Yes).

Table S2. *Demographics of all enrolled students in the six classes as well as for only those that participated in our study.*

| <b>Gender/Sex</b>                 | Number of enrolled students | Percent of enrolled students | Number of participating students | Percent of Participating students |
|-----------------------------------|-----------------------------|------------------------------|----------------------------------|-----------------------------------|
| Men                               | 508                         | 34.96%                       | 258                              | 26.6%                             |
| Women                             | 945                         | 65.04%                       | 679                              | 70.4%                             |
| Gender Queer                      |                             |                              | 1                                | 0.1%                              |
| Intersex                          |                             |                              | 1                                | 0.1%                              |
| Man, Woman                        |                             |                              | 1                                | 0.1%                              |
| Nonbinary                         |                             |                              | 2                                | 0.2%                              |
| <b>Race/Ethnicity</b>             |                             |                              |                                  |                                   |
| American Indian or Native Alaskan | 3                           | 0.21%                        | 3                                | 0.3%                              |
| Asian                             | 44                          | 3.02%                        | 38                               | 3.9%                              |
| Black or African American         | 80                          | 5.51%                        | 50                               | 5.2%                              |
| Caucasian/White                   | 1,174                       | 80.80%                       | 770                              | 79.8%                             |
| Hispanic                          | 68                          | 4.68%                        | 16                               | 1.7%                              |
| Non-residents                     | 28                          | 1.93%                        | 0                                | 0%                                |
| Two or more races or ethnicities  | 48                          | 3.30%                        | 56                               | 5.8%                              |
| Unknown                           | 8                           | 0.55%                        | 8                                | 0.8%                              |
| <b>Total</b>                      | 1453                        | 100%                         | 965                              | 100%                              |

*\*The information representing the number and percent of enrolled students was obtained from institutional data, explaining why Gender/Sex is binary because it is actually representing binary sex. On the other hand, the information representing the number and percent of participating students was collected via survey from the participating students and represents self-reported gender, rather than sex, and race/ethnicity. Of note, the options available on the survey are described in Table S1.*

Table S3. Breakdown of sample sizes for students reporting encountering and overcoming struggle in both the quantitative and qualitative datasets.

| Quantitative Dataset (N=960) |                       |                         |       |
|------------------------------|-----------------------|-------------------------|-------|
|                              | Fall 2019 Sample Size | Spring 2020 Sample Size | Total |
| Encounter Struggle (No)      | 63                    | 190                     | 253   |
| Encounter Struggle (Yes)     | 382                   | 325                     | 707   |
| Overcome Struggle (No)       | 101                   | 89                      | 190   |
| Overcome Struggle (Yes)      | 280                   | 235                     | 515   |
| Qualitative Dataset (N=707)  |                       |                         |       |
| Encounter Struggle (No)      | 47                    | 100                     | 147   |
| Encounter Struggle (Yes)     | 307                   | 253                     | 560   |
| Overcome Struggle (No)       | 79                    | 69                      | 148   |
| Overcome Struggle (Yes)      | 228                   | 184                     | 412   |

Table S4. Model selection determining factors influencing how students encounter struggle.

| Df | AIC          | Model                                                                                         |
|----|--------------|-----------------------------------------------------------------------------------------------|
| 5  | 938.8        | Encounter_Struggle ~ PC1 + Instructor                                                         |
| 4  | 936.8        | Encounter_Struggle ~ PC1 + Course                                                             |
| 8  | 937.3        | Encounter_Struggle ~ PC1 * Instructor                                                         |
| 6  | 933.7        | Encounter_Struggle ~ PC1 * Course                                                             |
| 10 | 951.0        | Encounter_Struggle ~ PC1 * Year_Rank                                                          |
| 6  | 951.3        | Encounter_Struggle ~ PC1 + Year_Rank                                                          |
| 7  | 933.6        | Encounter_Struggle ~ PC1 * Course + (1   AUID)                                                |
| 7  | <b>924.7</b> | <b>Encounter_Struggle ~ PC1 * Course + (1   Year_Rank)</b>                                    |
| 7  | 935.7        | Encounter_Struggle ~ PC1 * Course + (1   Section)                                             |
| 7  | 935.7        | Encounter_Struggle ~ PC1 * Course + (1   Semester)                                            |
| 7  | 935.7        | Encounter_Struggle ~ PC1 * Course + (1   Instructor)                                          |
| 8  | 925.4        | Encounter_Struggle ~ PC1 * Course + (1   AUID) + (1   Year_Rank)                              |
| 8  | 926.7        | Encounter_Struggle ~ PC1 * Course + (1   Instructor) + (1   Year_Rank)                        |
| 8  | 935.6        | Encounter_Struggle ~ PC1 * Course + (1   AUID) + (1   Semester)                               |
| 8  | 926.7        | Encounter_Struggle ~ PC1 * Course + (1   Semester) + (1   Year_Rank)                          |
| 8  | 937.7        | Encounter_Struggle ~ PC1 * Course + (1   Section) + (1   Semester)                            |
| 8  | 926.7        | Encounter_Struggle ~ PC1 * Course + (1   Section) + (1   Year_Rank)                           |
| 8  | 935.6        | Encounter_Struggle ~ PC1 * Course + (1   Section) + (1   AUID)                                |
| 9  | 937.6        | Encounter_Struggle ~ PC1 * Course + (1   Section) + (1   AUID) + (1 Semester)                 |
| 9  | 927.4        | Encounter_Struggle ~ PC1 * Course + (1   Section) + (1   AUID) + (1 Year_Rank)                |
| 9  | 928.7        | Encounter_Struggle ~ PC1 * Course + (1   Section) + (1   Year_Rank) + (1 Semester)            |
| 9  | 927.4        | Encounter_Struggle ~ PC1 * Course + (1   Year_Rank) + (1   AUID) + (1 Semester)               |
| 10 | 929.4        | Encounter_Struggle ~ PC1 * Course + (1   Section) + (1   AUID) + (1 Semester) + (1 Year_Rank) |



Table S5. Model selection determining factors influencing how students overcome struggle.

| Df       | AIC          | Model                                                                                            |
|----------|--------------|--------------------------------------------------------------------------------------------------|
| <b>5</b> | <b>764.3</b> | <b><i>Overcome_Struggle ~ PC1 + Instructor</i></b>                                               |
| 4        | 778.4        | Overcome_Struggle ~ PC1 + Course                                                                 |
| 8        | 766.0        | Overcome_Struggle ~ PC1 * Instructor                                                             |
| 6        | 779.6        | Overcome_Struggle ~ PC1 * Course                                                                 |
| 10       | 784.2        | Overcome_Struggle ~ PC1 * Year_Rank                                                              |
| 6        | 779.8        | Overcome_Struggle ~ PC1 + Year_Rank                                                              |
| 6        | 764.6        | Overcome_Struggle ~ PC1 + Instructor + (1   AUID)                                                |
| 6        | 766.3        | Overcome_Struggle ~ PC1 + Instructor + (1   Year_Rank)                                           |
| 6        | 766.3        | Overcome_Struggle ~ PC1 + Instructor + (1   Section)                                             |
| 6        | 766.3        | Overcome_Struggle ~ PC1 + Instructor + (1   Semester)                                            |
| 7        | 766.6        | Overcome_Struggle ~ PC1 + Instructor + (1   AUID) + (1   Year_Rank)                              |
| 7        | 766.6        | Overcome_Struggle ~ PC1 + Instructor + (1   AUID) + (1   Semester)                               |
| 7        | 768.3        | Overcome_Struggle ~ PC1 + Instructor + (1   Semester) + (1   Year_Rank)                          |
| 7        | 768.3        | Overcome_Struggle ~ PC1 + Instructor + (1   Section) + (1   Semester)                            |
| 7        | 768.3        | Overcome_Struggle ~ PC1 + Instructor + (1   Section) + (1   Year_Rank)                           |
| 7        | 766.6        | Overcome_Struggle ~ PC1 + Instructor + (1   Section) + (1   AUID)                                |
| 8        | 768.6        | Overcome_Struggle ~ PC1 + Instructor + (1   Section) + (1   AUID) + (1 Semester)                 |
| 8        | 768.6        | Overcome_Struggle ~ PC1 + Instructor + (1   Section) + (1   AUID) + (1 Year_Rank)                |
| 8        | 770.3        | Overcome_Struggle ~ PC1 + Instructor + (1   Section) + (1   Year_Rank) + (1 Semester)            |
| 8        | 768.6        | Overcome_Struggle ~ PC1 + Instructor + (1   Year_Rank) + (1   AUID) + (1 Semester)               |
| 9        | 770.6        | Overcome_Struggle ~ PC1 + Instructor + (1   Section) + (1   AUID) + (1 Semester) + (1 Year_Rank) |

Table S6. Linear model results of Encounter Struggle ~ PC1 \* Course + (1 | Year\_Rank).

| <b>Effects of Prep. Scores on Encountering Struggle</b> |                  |                 |                |                    |            |
|---------------------------------------------------------|------------------|-----------------|----------------|--------------------|------------|
| <i>Fixed Effects</i>                                    | <i>Estimates</i> | <i>St. Er.</i>  | <i>Z value</i> | <i>Pr(&gt; z )</i> |            |
| <b>(Intercept)</b>                                      | <b>1.6386</b>    | <b>0.2668</b>   | <b>6.143</b>   | <b>8.11e-10</b>    | <b>***</b> |
| <b>PC1</b>                                              | <b>-0.6618</b>   | <b>0.1335</b>   | <b>-4.957</b>  | <b>7.15e-07</b>    | <b>***</b> |
| <b>Course 2</b>                                         | <b>-1.0670</b>   | <b>0.2178</b>   | <b>-4.899</b>  | <b>9.65e-07</b>    | <b>***</b> |
| <b>Course 3</b>                                         | <b>-1.4248</b>   | <b>0.2410</b>   | <b>-5.911</b>  | <b>3.40e-09</b>    | <b>***</b> |
| PC1:Course 2                                            | 0.3225           | 0.1732          | 1.863          | 0.0625             | .          |
| <b>PC1:Course 3</b>                                     | <b>0.4512</b>    | <b>0.1791</b>   | <b>2.519</b>   | <b>0.0118</b>      | <b>*</b>   |
| <i>Random Effects:</i>                                  |                  |                 |                |                    |            |
|                                                         | <i>Variance</i>  | <i>St. Dev.</i> |                |                    |            |
| Year_Rank (Intercept)                                   | 0.1347           | 0.367           |                |                    |            |
| N Student                                               | 5                |                 |                |                    |            |
| N Observations                                          | 906              |                 |                |                    |            |
| <i>Correlation of Fixed Effects:</i>                    |                  |                 |                |                    |            |
|                                                         | (Intr)           | PC1             | Course 2       | Course 3           | PC1:Course |
| PC1                                                     | -0.251           |                 |                |                    |            |
| Course 2                                                | -0.587           | 0.319           |                |                    |            |
| Course 3                                                | -0.580           | 0.278           | 0.605          |                    |            |
| PC1:Course 2                                            | 0.242            | -0.766          | -0.310         | -0.251             |            |
| PC1:Course 3                                            | 0.204            | -0.744          | -0.247         | -0.298             | 0.572      |

Table S7. Linear model results of *Overcome Struggle* ~ *PC1* + *Instructor* + (*1* / *Student*).

| <b>Effects of Prep. Scores on Overcoming Struggle</b> |                  |                 |                |                    |     |
|-------------------------------------------------------|------------------|-----------------|----------------|--------------------|-----|
| <i>Fixed Effects</i>                                  | <i>Estimates</i> | <i>St. Er.</i>  | <i>Z value</i> | <i>Pr(&gt; z )</i> |     |
| (Intercept)                                           | 1.14223          | 0.21520         | 5.308          | <b>1.11e-07</b>    | *** |
| PC1                                                   | 0.25209          | 0.08559         | 2.945          | <b>0.00322</b>     | **  |
| Instructor 1                                          | -0.48089         | 0.25758         | -1.867         | 0.06191            | .   |
| Instructor 4                                          | 0.19719          | 0.30917         | 0.638          | 0.52359            |     |
| Instructor 2                                          | 0.57199          | 0.26643         | 2.147          | 0.52359            | *   |
| <i>Random Effects:</i>                                |                  |                 |                |                    |     |
|                                                       | <i>Variance</i>  | <i>St. Dev.</i> |                |                    |     |
| Student (Intercept)                                   | 0.5694           | 0.7546          |                |                    |     |
| N Student                                             | 593              |                 |                |                    |     |
| N Observations                                        | 672              |                 |                |                    |     |
| <i>Correlation of Fixed Effects:</i>                  |                  |                 |                |                    |     |
|                                                       | (Intr)           | PC1             | InstrB         | InstrD             |     |
| PC1                                                   | 0.238            |                 |                |                    |     |
| Instr 1                                               | -0.659           | -0.084          |                |                    |     |
| Instr 4                                               | -0.415           | -0.018          | 0.380          |                    |     |
| Instr 2                                               | -0.457           | 0.084           | 0.426          | 0.404              |     |

Figure S2

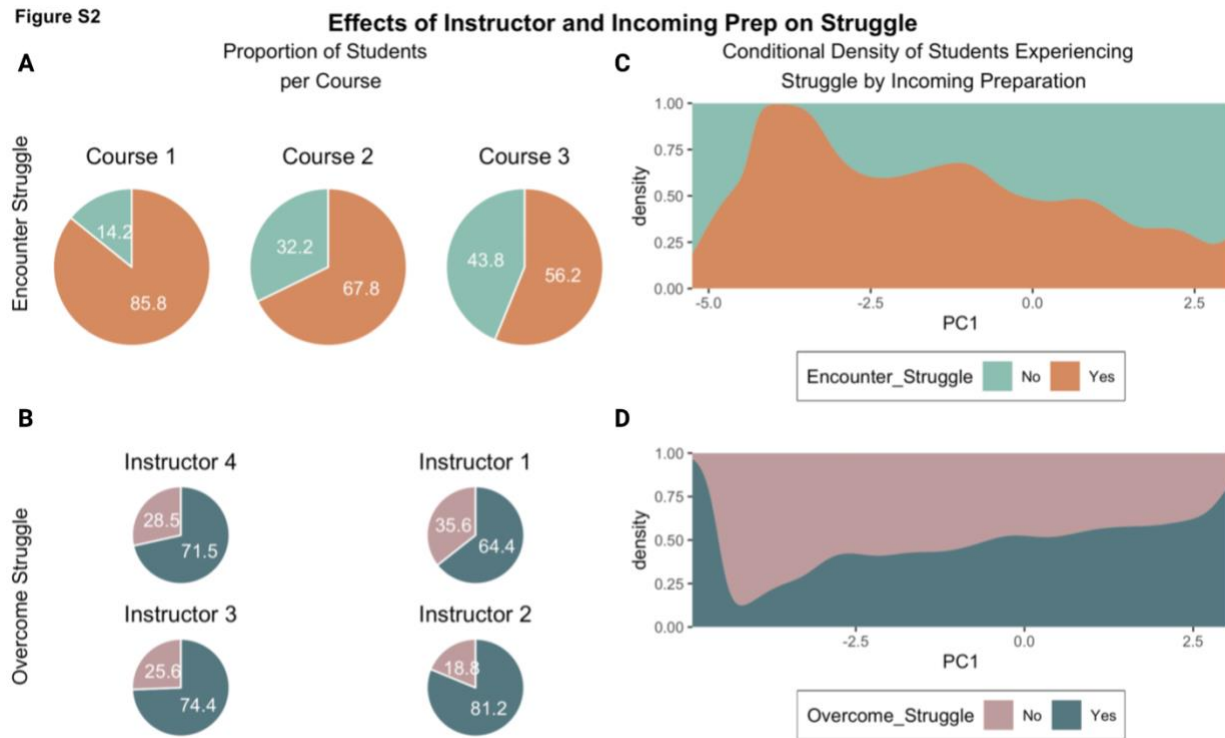

Figure S2. *Effects of Instructor and Incoming Preparation on Struggle.* Proportion of students who A) encountered struggle grouped by course (the factor that was a significant in the model selection for encountering struggle), and B) overcame struggle grouped by instructor (the factor that was a significant in the model selection for overcoming struggle). Conditional density plots of students who C) encountered struggle and D) overcame struggle correlated to their incoming preparation (PC1).

Table S8. Model selection determining best fit model examining if encountering struggle influences course performance.

| Df       | AIC           | Model                                                                                                 |
|----------|---------------|-------------------------------------------------------------------------------------------------------|
| 3        | 6842.0        | Final.Score ~ Encounter_Struggle                                                                      |
| 4        | 6295.6        | Final.Score ~ Encounter_Struggle + PC1                                                                |
| 5        | 6295.8        | Final.Score ~ Encounter_Struggle*PC1                                                                  |
| 5        | 6255.2        | Final.Score ~ Encounter_Struggle + PC1 + (1   Instructor)                                             |
| 5        | 6257.6        | Final.Score ~ Encounter_Struggle + PC1 + (1   Section)                                                |
| 5        | 6271.7        | Final.Score ~ Encounter_Struggle + PC1 + (1   Semester)                                               |
| 5        | 6280.3        | Final.Score ~ Encounter_Struggle + PC1 + (1   AUID)                                                   |
| <b>6</b> | <b>6223.9</b> | <b>Final.Score ~ Encounter_Struggle + PC1 + (1 Instructor) + (1   AUID)</b>                           |
| 6        | 6234.8        | Final.Score ~ Encounter_Struggle + PC1 + (1 Course) + (1   AUID)                                      |
| 6        | 6225.8        | Final.Score ~ Encounter_Struggle + PC1 + (1 Section) + (1   AUID)                                     |
| 6        | 6246.2        | Final.Score ~ Encounter_Struggle + PC1 + (1 Semester) + (1   AUID)                                    |
| 6        | 6257.1        | Final.Score ~ Encounter_Struggle + PC1 + (1 Instructor) + (1   Section)                               |
| 6        | 6256.9        | Final.Score ~ Encounter_Struggle + PC1 + (1 Instructor) + (1   Semester)                              |
| 6        | 6258.5        | Final.Score ~ Encounter_Struggle + PC1 + (1 Section) + (1   Semester)                                 |
| 7        | 6226.7        | Final.Score ~ Encounter_Struggle + PC1 + (1 Section) + (1   Semester) + (1   AUID)                    |
| 7        | 6258.8        | Final.Score ~ Encounter_Struggle + PC1 + (1 Section) + (1   Semester) + (1   Instructor)              |
| 7        | 6225.5        | Final.Score ~ Encounter_Struggle + PC1 + (1 Section) + (1   Instructor) + (1   AUID)                  |
| 7        | 6225.7        | Final.Score ~ Encounter_Struggle + PC1 + (1 Instructor) + (1   Semester) + (1   AUID)                 |
| 8        | 6227.2        | Final.Score ~ Encounter_Struggle + PC1 + (1 Instructor) + (1   Semester) + (1   AUID) + (1   Section) |

Table S9. *Linear model of Final Score by Encounter Struggle (Y/N) and Incoming Preparation.*

| <b>Effects of Encountering Struggle and Incoming Preparation on Performance</b> |                 |                   |                 |                      |            |
|---------------------------------------------------------------------------------|-----------------|-------------------|-----------------|----------------------|------------|
| <i>Fixed Effects</i>                                                            | <i>Estimate</i> | <i>Std. Error</i> | <i>t value</i>  | <i>Pr (&gt;  t )</i> |            |
| (Intercept)                                                                     | 86.2            | 1.4               | 62.4            | <b>&lt;0.001</b>     | **         |
| Encounter Struggle (Yes)                                                        | -3.7            | 0.66              | -5.5            | <b>&lt;0.001</b>     | **         |
| PC1                                                                             | 3.9             | 0.24              | <b>16.2</b>     | <b>&lt;0.001</b>     | **         |
|                                                                                 |                 |                   |                 |                      | *          |
| <i>Random Effects:</i>                                                          |                 |                   |                 |                      |            |
|                                                                                 | <i>Variance</i> | <i>St. Dev.</i>   |                 |                      |            |
| Student ID (Intercept)                                                          | 41.0            | 6.4               |                 |                      |            |
| Instructor (Intercept)                                                          | 6.3             | 2.5               |                 |                      |            |
| Residual                                                                        | 29.2            | 5.4               |                 |                      |            |
| N Student ID                                                                    | 769             |                   |                 |                      |            |
| N Instructor                                                                    | 4               |                   |                 |                      |            |
| N Observations                                                                  | 882             |                   |                 |                      |            |
| <i>Correlation of Fixed Effects:</i>                                            |                 |                   |                 |                      |            |
|                                                                                 | (Intr)          | Enc. Str.         |                 |                      |            |
| Encounter Struggle (Y)                                                          | -0.4            |                   |                 |                      |            |
| PC1 (Incoming Prep)                                                             | -0.1            | 0.2               |                 |                      |            |
|                                                                                 | <i>Min.</i>     | <i>1Q</i>         | <i>Media</i>    | <i>3Q</i>            | <i>Max</i> |
| Scaled Residuals                                                                | -4.5            | -0.4              | <i>n</i><br>0.1 | 0.4                  | 2.2        |

Table S10. Model selection determining best fit model examining if overcoming struggle influences course performance.

| Df       | AIC           | Model                                                                                                |
|----------|---------------|------------------------------------------------------------------------------------------------------|
| 3        | 5082.4        | Final.Score ~ Overcome_Struggle                                                                      |
| 4        | 4718.2        | Final.Score ~ Overcome_Struggle + PC1                                                                |
| 5        | 4718.1        | Final.Score ~ Overcome_Struggle*PC1                                                                  |
| 5        | 4698.3        | Final.Score ~ Overcome_Struggle + PC1 + (1   Instructor)                                             |
| 5        | 4699.8        | Final.Score ~ Overcome_Struggle + PC1 + (1   Section)                                                |
| 5        | 4705.4        | Final.Score ~ Overcome_Struggle + PC1 + (1   Semester)                                               |
| 5        | 4716.1        | Final.Score ~ Overcome_Struggle + PC1 + (1   AUID)                                                   |
| <b>6</b> | <b>4690.3</b> | <b>Final.Score ~ Overcome_Struggle + PC1 + (1 Instructor) + (1   AUID)</b>                           |
| 6        | 4691.9        | Final.Score ~ Overcome_Struggle + PC1 + (1 Section) + (1   AUID)                                     |
| 6        | 4700.4        | Final.Score ~ Overcome_Struggle + PC1 + (1 Semester) + (1   AUID)                                    |
| 6        | 4700.2        | Final.Score ~ Overcome_Struggle + PC1 + (1 Instructor) + (1   Section)                               |
| 6        | 4699.9        | Final.Score ~ Overcome_Struggle + PC1 + (1 Instructor) + (1   Semester)                              |
| 6        | 4700.9        | Final.Score ~ Overcome_Struggle + PC1 + (1 Section) + (1   Semester)                                 |
| 7        | 4693.0        | Final.Score ~ Overcome_Struggle + PC1 + (1 Section) + (1   Semester) + (1   AUID)                    |
| 7        | 4701.9        | Final.Score ~ Overcome_Struggle + PC1 + (1 Section) + (1   Semester) + (1   Instructor)              |
| 7        | 4692.2        | Final.Score ~ Overcome_Struggle + PC1 + (1 Section) + (1   Instructor) + (1   AUID)                  |
| 7        | 4692.0        | Final.Score ~ Overcome_Struggle + PC1 + (1 Instructor) + (1   Semester) + (1   AUID)                 |
| 8        | 4693.9        | Final.Score ~ Overcome_Struggle + PC1 + (1 Instructor) + (1   Semester) + (1   AUID) + (1   Section) |

Table S11. *Linear model of Final Score by Overcoming Struggle (Y/N) and Incoming Preparation.*

| <b>Effects of Overcoming Struggle and Incoming Preparation on Performance</b> |                 |                   |                |                      |            |
|-------------------------------------------------------------------------------|-----------------|-------------------|----------------|----------------------|------------|
| <i>Fixed Effects</i>                                                          | <i>Estimate</i> | <i>Std. Error</i> | <i>t value</i> | <i>Pr (&gt;  t )</i> |            |
| (Intercept)                                                                   | 79.9507         | 1.2837            | 62.279         | < <b>0.001</b>       | ***        |
| Overcome Struggle (Yes)                                                       | 3.5555          | 0.7579            | 4.691          | < <b>0.001</b>       | ***        |
| PC1                                                                           | 3.9808          | 0.2871            | 13.866         | < <b>0.001</b>       | ***        |
| <i>Random Effects:</i>                                                        |                 |                   |                |                      |            |
|                                                                               | <i>Variance</i> | <i>St. Dev.</i>   |                |                      |            |
| Student ID                                                                    | 34.293          | 5.856             |                |                      |            |
| Instructor                                                                    | 4.828           | 2.197             |                |                      |            |
| Residual                                                                      | 38.172          | 6.178             |                |                      |            |
| N Student ID                                                                  | 585             |                   |                |                      |            |
| N Instructor                                                                  | 4               |                   |                |                      |            |
| N Observations                                                                | 659             |                   |                |                      |            |
| <i>Correlation of Fixed Effects:</i>                                          |                 |                   |                |                      |            |
|                                                                               | (Intr)          | Ov Str            |                |                      |            |
| Overcome Struggle (Y)                                                         | -0.438          |                   |                |                      |            |
| PC1 (Incoming Prep)                                                           | 0.073           | -0.117            |                |                      |            |
|                                                                               | <i>Min.</i>     | <i>1Q</i>         | <i>Median</i>  | <i>3Q</i>            | <i>Max</i> |
| Scaled Residuals                                                              | -4.9859         | -0.3949           | 0.1047         | 0.46                 | 2.3835     |
